# Supplementary material for: Quantifying Fluorescence Lifetime Responsiveness of Environment-Sensitive Probes for Membrane Fluidity Measurements
Source: PubMed Central journal article supplement (PMC10926104; doi:10.1021/acs.jpcb.3c07006), 2024-02-28
Supplement: jp3c07006_si_001.pdf [file jp3c07006_si_001.pdf]

## Supporting Information

### Quantifying Fluorescence Lifetime Responsiveness of Environment-Sensitive Probes for Membrane Fluidity Measurements

Franziska Ragaller<sup>1</sup>, Ellen Sjule<sup>1</sup>, Yagmur Balim Urem<sup>1</sup>, Jan Schlegel<sup>1</sup>, Rojbin El<sup>2</sup>, Dunja Urbancic<sup>2,3</sup>, Iztok Urbancic<sup>4</sup>, Hans Blom<sup>5</sup>, Erdinc Sezgin<sup>1,\*</sup>

<sup>1</sup>Science for Life Laboratory, Karolinska Institutet, Department of Women's and Children's Health, 17165, Solna, Sweden

<sup>2</sup>Weatherall Institute of Molecular Medicine, University of Oxford, OX39DS, Oxford, United Kingdom

<sup>3</sup>Faculty of Pharmacy, University of Ljubljana, SI-1000 Ljubljana, Slovenia

<sup>4</sup>Laboratory of Biophysics, Condensed Matter Physics Department, Jožef Stefan Institute, Jamova Cesta 39, 1000 Ljubljana, Slovenia

<sup>5</sup>Science for Life Laboratory, Department of Applied Physics, Royal Institute of Technology, 17165, Solna, Sweden.

Correspondence:

Erdinc Sezgin

[erdinc.sezgin@ki.se](mailto:erdinc.sezgin@ki.se)

Phone: 0046702318248

**Table S1: Acquisition parameters for all FLIM measurements.**

|                         | probe               | laser intensity                     | frame repetitions | line repetitions | scan speed | detector                           | emission                                     |                                        |                                        |                                              |
|-------------------------|---------------------|-------------------------------------|-------------------|------------------|------------|------------------------------------|----------------------------------------------|----------------------------------------|----------------------------------------|----------------------------------------------|
| LUVs                    | Flipper (1 $\mu$ M) | 20%                                 | 10 - 20           | 1                | 400 Hz     | SMD HyD (10% Gain) photon-counting | 500-700 nm in 20 nm intervals (sequentially) |                                        |                                        |                                              |
|                         | NR12S (1 $\mu$ M)   | 15%                                 | 10                | 1                |            |                                    |                                              |                                        |                                        |                                              |
|                         | NR12A (1 $\mu$ M)   | 15%                                 | 10                | 1                |            |                                    |                                              |                                        |                                        |                                              |
|                         | AF488 (1 $\mu$ M)   | 2%                                  | 10                | 1                |            |                                    |                                              |                                        |                                        |                                              |
| phase-separated<br>GUVs | Flipper (300 nM)    | 5% (500-600 nm)<br>10% (600-700 nm) | 1                 | 4                | 200 Hz     |                                    | SMD HyD (10% Gain) photon-counting           | 500-600 nm & 600-700 nm (sequentially) |                                        |                                              |
|                         | NR12S (100 nM)      | 5%                                  | 1                 | 2                |            |                                    |                                              |                                        |                                        |                                              |
|                         | NR12A (100 nM)      | 5%                                  | 1                 | 2                |            |                                    |                                              |                                        |                                        |                                              |
| cells                   | Flipper (1 $\mu$ M) | 3-5%                                | 1                 | 4                | 200 Hz     |                                    |                                              | SMD HyD (10% Gain) photon-counting     | 500-600 nm & 600-700 nm (sequentially) |                                              |
|                         | NR12S (1 $\mu$ M)   | 1%                                  | 1                 | 4                |            |                                    |                                              |                                        |                                        |                                              |
|                         | NR12A (1 $\mu$ M)   | 0.2 - 1 %                           | 1                 | 4                |            |                                    |                                              |                                        |                                        |                                              |
| VLPs                    | Flipper (300 nM)    | 15%                                 | 2                 | 16               | 400 Hz     |                                    |                                              |                                        | SMD HyD (10% Gain) photon-counting     | 500-700 nm in 20 nm intervals (sequentially) |
|                         | NR12S (100 nM)      | 15%                                 | 2                 | 16               |            |                                    |                                              |                                        |                                        |                                              |
|                         | NR12A (100 nM)      | 15%                                 | 2                 | 16               |            |                                    |                                              |                                        |                                        |                                              |

**Table S2: Fitting parameters for all FLIM measurements.**

| analysis area | laser frequency                 | fitting range                     | probe                                               | number of fitting components                                                                          | environment                                                                                                            |                        |
|---------------|---------------------------------|-----------------------------------|-----------------------------------------------------|-------------------------------------------------------------------------------------------------------|------------------------------------------------------------------------------------------------------------------------|------------------------|
| LUVs          | 20 MHz                          | 0.2-45 ns for each 20 nm window   | Flipper                                             | 2 components: 500-700 nm                                                                              | all lipid compositions                                                                                                 |                        |
|               |                                 |                                   | NR12S                                               | 2 components: 500-620 nm<br>1 component: 620-700 nm                                                   | DAPC, $\Delta 6cis$ DOPC, $\Delta 9cis$ DOPC, $\Delta 9trans$ DOPC, POPC, POPC:Chol 90:10, POPC:Chol 80:20, POPS, POPE |                        |
|               |                                 | NR12A                             | 2 components: 500-600 nm<br>1 component: 600-700 nm | POPC:Chol 50:50, DPPC:Chol 50:50                                                                      |                                                                                                                        |                        |
|               |                                 | NR12A                             | 2 components: 500-640 nm<br>1 component: 640-700 nm | DAPC, $\Delta 6cis$ DOPC, $\Delta 9cis$ DOPC, $\Delta 9trans$ DOPC, POPC, POPC:Chol 90:10, POPS, POPE |                                                                                                                        |                        |
|               |                                 | AF 488                            | 2 components: 500-620 nm<br>1 component: 620-700 nm | POPC:Chol 80:20, POPC:Chol 50:50, DPPC:Chol 50:50                                                     |                                                                                                                        |                        |
|               |                                 | Flipper                           | 1 component: 500-700 nm                             | in water                                                                                              |                                                                                                                        |                        |
|               |                                 | NR12S                             | 2 components                                        | all lipid compositions                                                                                |                                                                                                                        |                        |
|               |                                 | NR12A                             | 2 components                                        | all lipid compositions                                                                                |                                                                                                                        |                        |
|               |                                 | 40 MHz                            | 0.2-45 ns from 500-600 nm or over whole spectrum    | NR12S                                                                                                 | 2 components                                                                                                           | all lipid compositions |
|               |                                 |                                   |                                                     | NR12A                                                                                                 | 2 components                                                                                                           | all lipid compositions |
|               | 0.2-25 ns for each 20 nm window |                                   | NR12A                                               | 2 components: 500-640 nm<br>1 component: 640-700 nm                                                   | $\Delta 9cis$ DOPC, POPC                                                                                               |                        |
|               |                                 |                                   | NR12A                                               | 2 components: 500-620 nm<br>1 component: 620-700 nm                                                   | DPPC:Chol 50:50                                                                                                        |                        |
|               | 80 MHz                          | 0.2-12.5 ns for each 20 nm window | NR12A                                               | 2 components: 500-640 nm<br>1 component: 640-700 nm                                                   | $\Delta 9cis$ DOPC, POPC                                                                                               |                        |
|               |                                 |                                   | NR12A                                               | 2 components: 500-620 nm<br>1 component: 620-700 nm                                                   | DPPC:Chol 50:50                                                                                                        |                        |

|                      | analysis area                | laser frequency | fitting range                       | probe   | number of fitting components | environment     |
|----------------------|------------------------------|-----------------|-------------------------------------|---------|------------------------------|-----------------|
| phase-separated GUVs | region of interest selection | 20 MHz          | 0.2-45 ns for each<br>100 nm window | Flipper | 2 components: 500-700 nm     | Ld and Lo phase |
|                      |                              |                 |                                     | NR12S   | 3 components: 500-600 nm     | Ld phase        |
|                      |                              |                 |                                     |         | 1 component: 600-700 nm      | Lo phase        |
|                      |                              |                 |                                     | NR12A   | 2 components: 500-600 nm     | Ld phase        |
|                      |                              |                 |                                     |         | 1 component: 600-700 nm      | Lo phase        |
|                      |                              |                 |                                     | cells   | whole image analysis         | 20 MHz          |
| NR12S                | 3 components: 500-600 nm     | all cell types  |                                     |         |                              |                 |
|                      | 2 components: 600-700 nm     | all cell types  |                                     |         |                              |                 |
| NR12A                | 3 components: 500-600 nm     | all cell types  |                                     |         |                              |                 |
|                      | 1 component: 600-700 nm      | all cell types  |                                     |         |                              |                 |
| VLPs                 | whole image analysis         | 20 MHz          | 0.2-45 ns for each<br>20 nm window  |         |                              |                 |
|                      |                              |                 |                                     | NR12S   | 2 components: 500-620 nm     | all VLPs        |
|                      |                              |                 |                                     |         | 1 component: 620-700 nm      | all VLPs        |
|                      |                              |                 |                                     | NR12A   | 2 components: 500-620 nm     | all VLPs        |
|                      |                              |                 |                                     |         | 1 component: 620-700 nm      | all VLPs        |

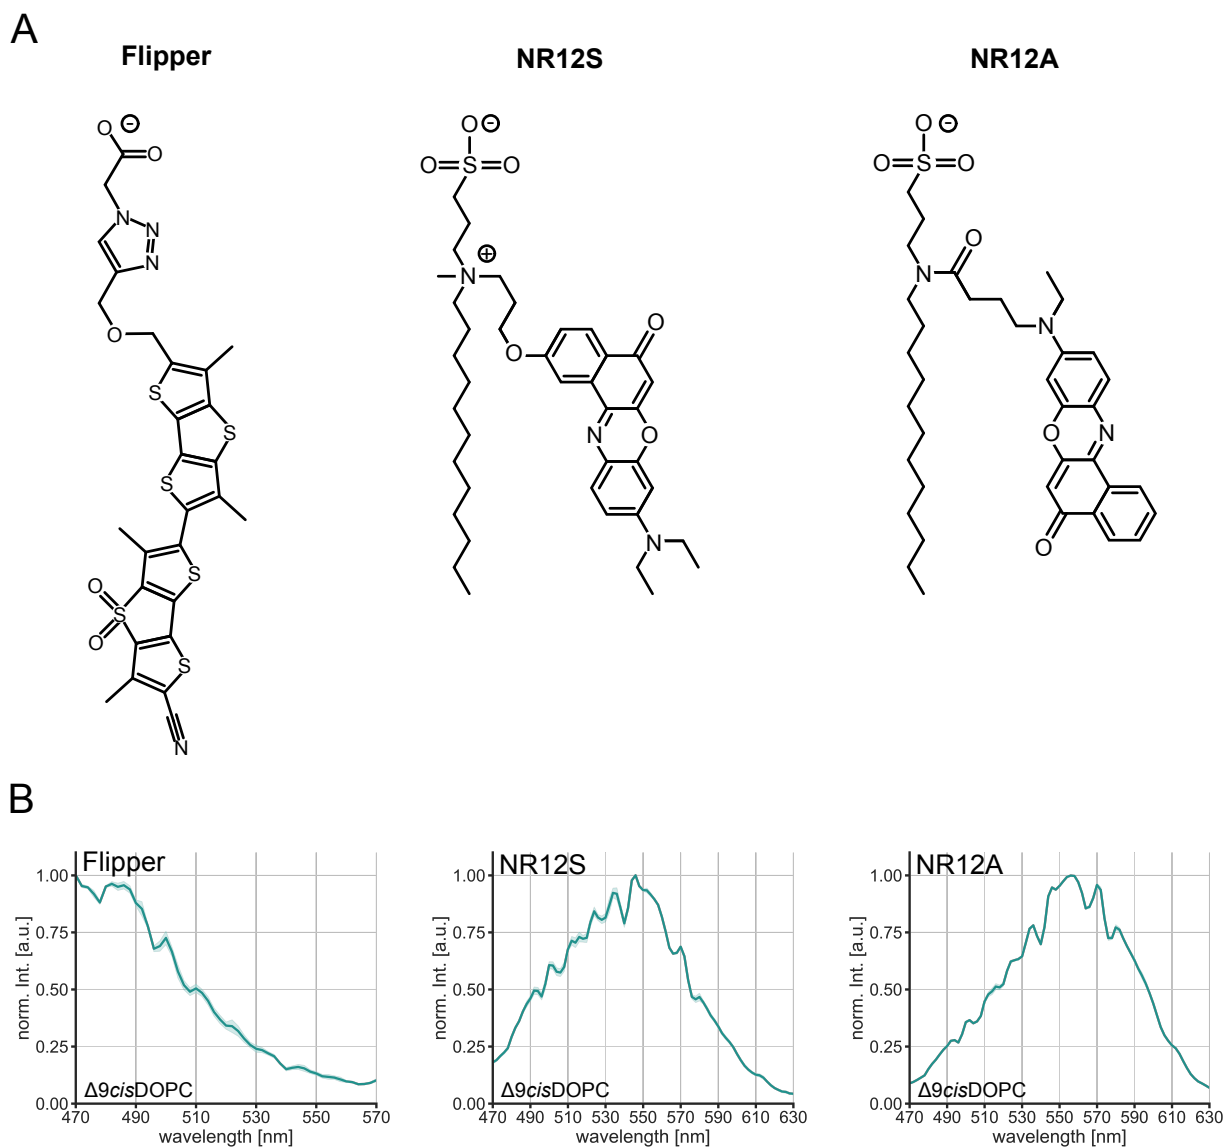

**Figure S1: Chemical structures and excitation spectra of Flipper, NR12S and NR12A.** A| Chemical structures of Flipper, NR12S and NR12A. B| Excitation spectra of the three probes (1  $\mu$ M) in  $\Delta 9cisDOPC$  LUVs corrected for background signal. Line corresponds to the mean of three technical replicates. Band corresponds to the standard deviation.

## cholesterol

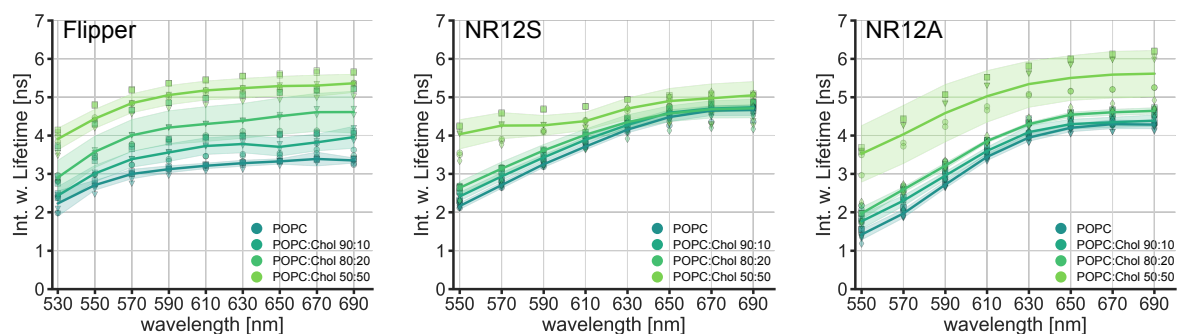

## double bond position & configuration

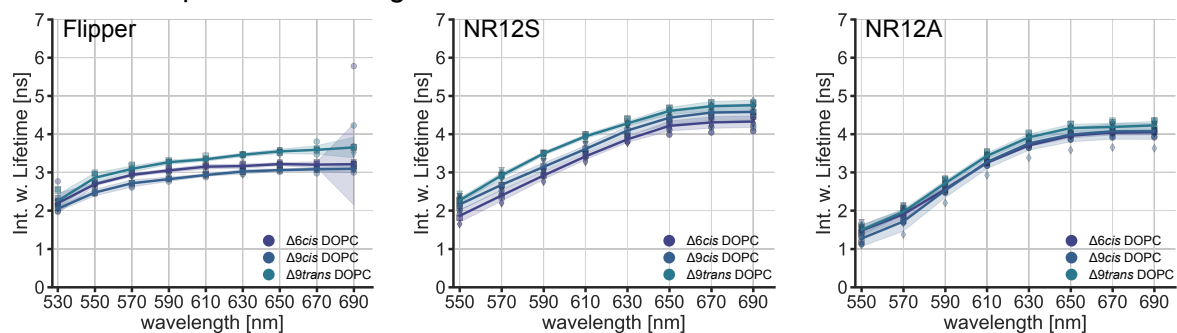

## headgroup

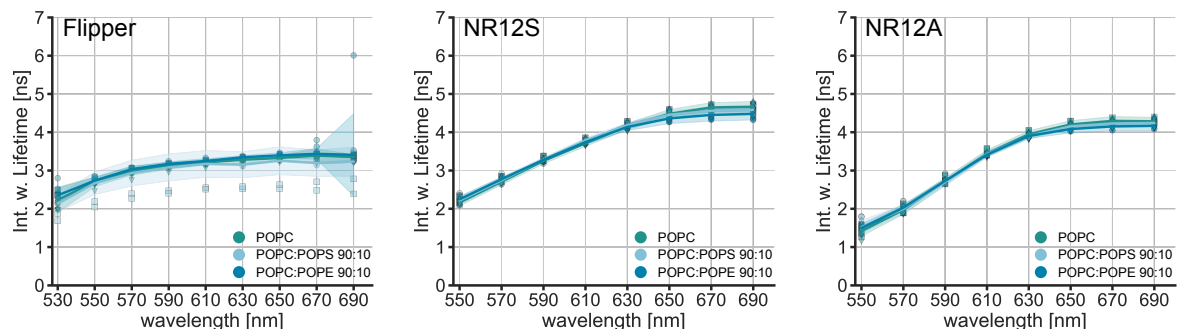

● Rep. 1   ▲ Rep. 2   ■ Rep. 3   ◆ Rep. 4

**Figure S2: Lifetimes of Flipper, NR12S and NR12A in different lipid environments.** Spectral fluorescence lifetime measurements of the probes in LUVs were carried out within 500-700 nm in intervals of 20 nm. Multiexponential curve fitting was performed for the fluorescence decays (for details see Material and Methods). Spectrally resolved intensity weighted lifetime of Flipper (left), NR12S (middle) and NR12A (right) in different lipid environments investigating cholesterol content (above), double bond position and configuration (middle) and headgroup geometry and charge (below). Line corresponds to the median of individual biological replicates shown with different symbols ( $n \geq 3$ ). Band corresponds to standard deviation.

### cholesterol

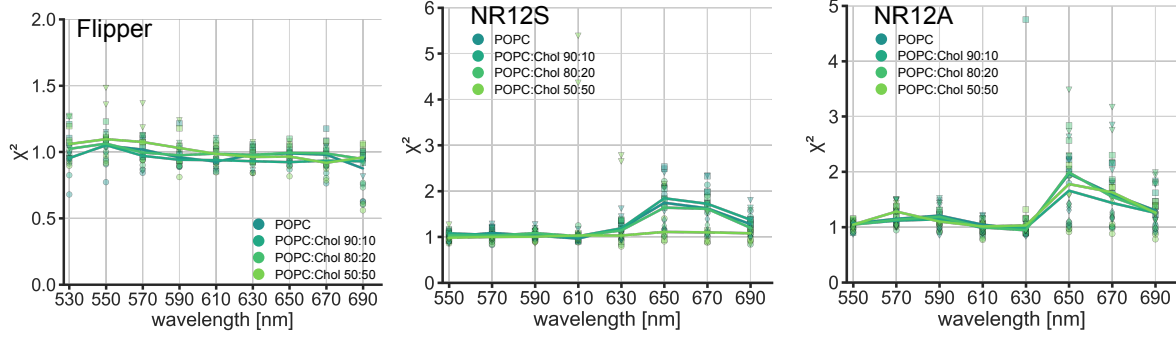

### saturation

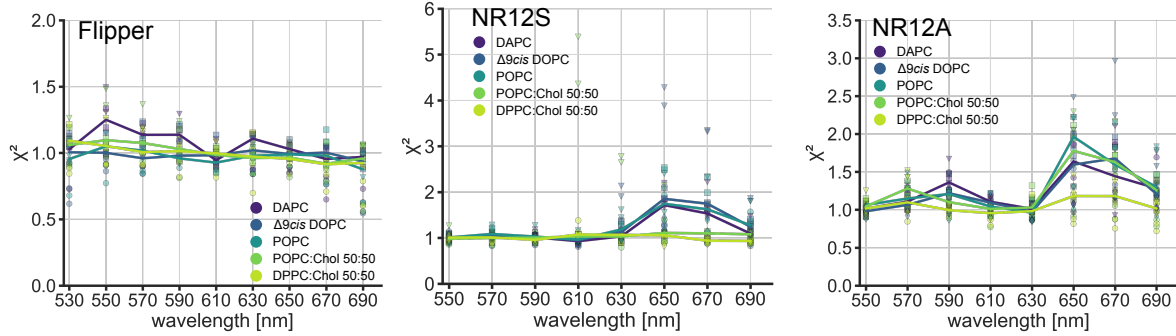

### double bond position & configuration

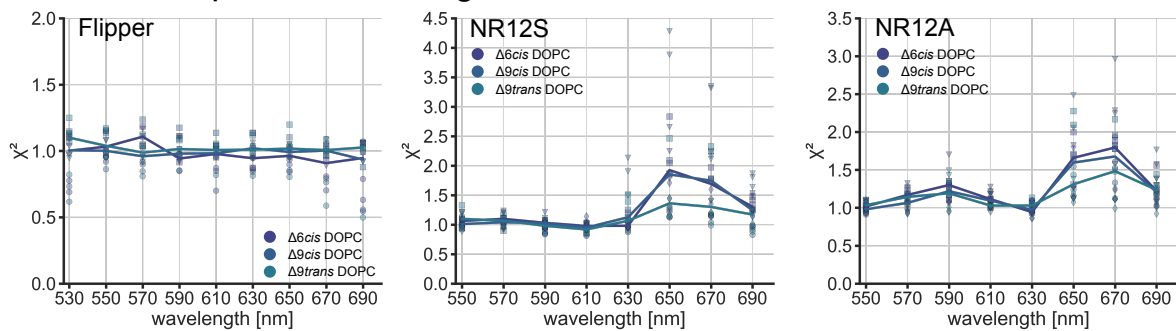

### headgroup

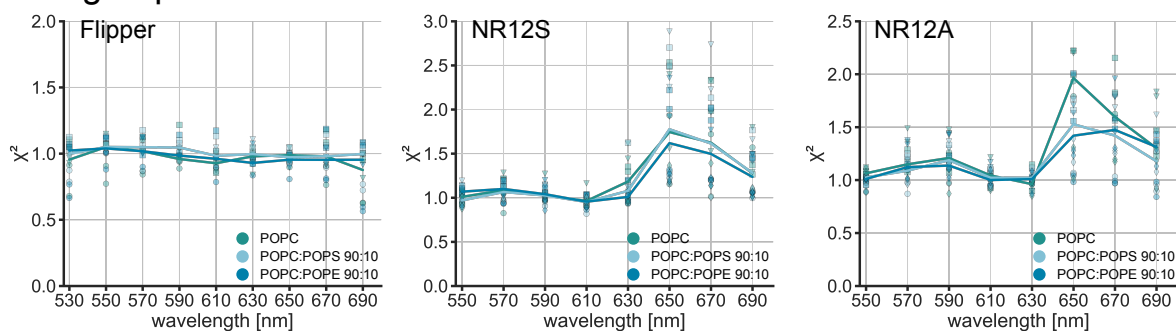

● Rep. 1   ▲ Rep. 2   ■ Rep. 3   ◆ Rep. 4

**Figure S3: Chi-squared values of the multiexponential curve fitting of Flipper, NR12S and NR12A in different lipid environments.**

Spectral fluorescence lifetime measurements of the probes in LUVs were carried out within 500-700 nm in intervals of 20 nm. Multiexponential curve fitting was performed for the fluorescence decays (for details see Material and Methods).  $\chi^2$  values serve as indicator for the goodness of the fit and were obtained for each 20 nm interval and are shown for Flipper (left), NR12S (middle) and NR12A (right) in different lipid environments investigating cholesterol content (1<sup>st</sup> row), saturation index (2<sup>nd</sup> row) double bond position and configuration (3<sup>rd</sup> row) and headgroup geometry and charge (4<sup>th</sup> row). Line corresponds to the median of individual biological replicates shown with different symbols ( $n \geq 3$ ).



A

NR12A

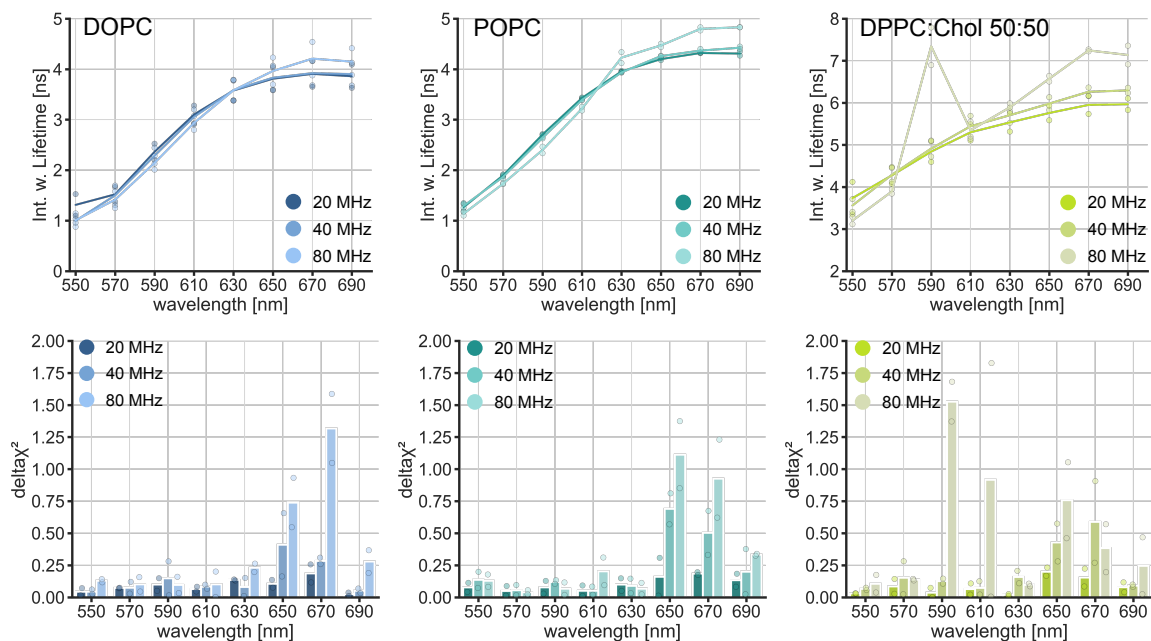

B

NR12S - DPPC:Chol 50:50

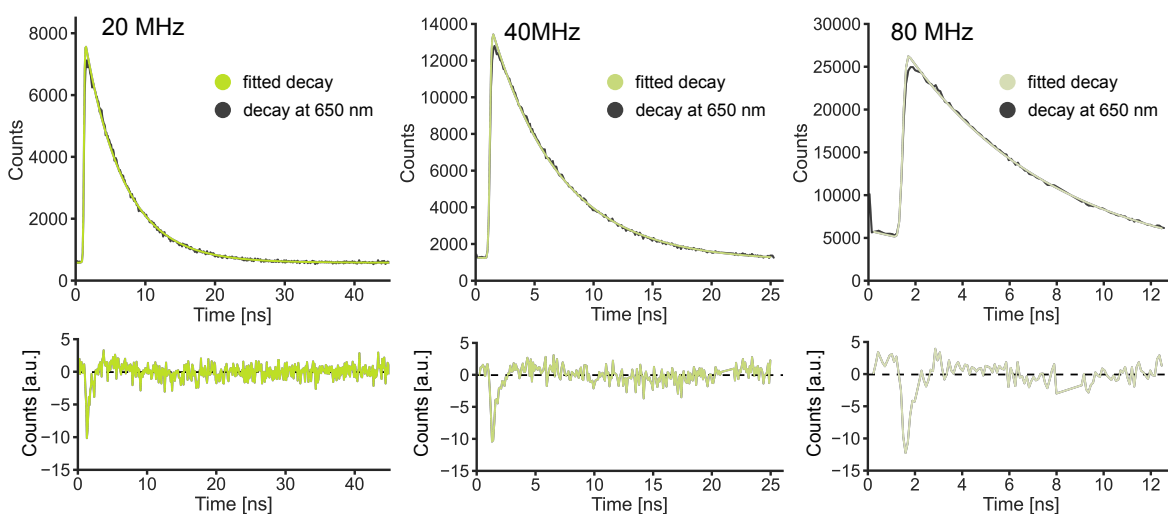

**Figure S4: Influence of laser frequency on lifetime analysis.** Spectral fluorescence lifetime measurements of the probes in LUVs were carried out within 500-700 nm in intervals of 20 nm. Multiexponential curve fitting was performed for the fluorescence decays (for details see Material and Methods). The estimated lifetimes of multiexponential curve fitting and the goodness of the fit are evaluated at different laser frequencies: 20, 40 and 80 MHz. A) Spectrally resolved intensity weighted lifetime of NR12A in in  $\Delta 9cis$  DOPC (left, blue), POPC (middle, cyan) and DPPC:Chol 50:50 (right, green) at different laser frequencies. The corresponding  $\chi^2$  values serve as indicator for the goodness of the fit and were obtained for each 20 nm interval and are shown below. The line and bar correspond to the median and average, respectively, of two technical replicates. B) Fluorescence decays (grey) and

their corresponding fit (green) of NR12S in DPPC:Chol 50:50 at 650 nm at different laser frequencies: 20 MHz (left), 40 MHz (middle) and 80 MHz (right). Corresponding residual counts in artificial units are shown below.

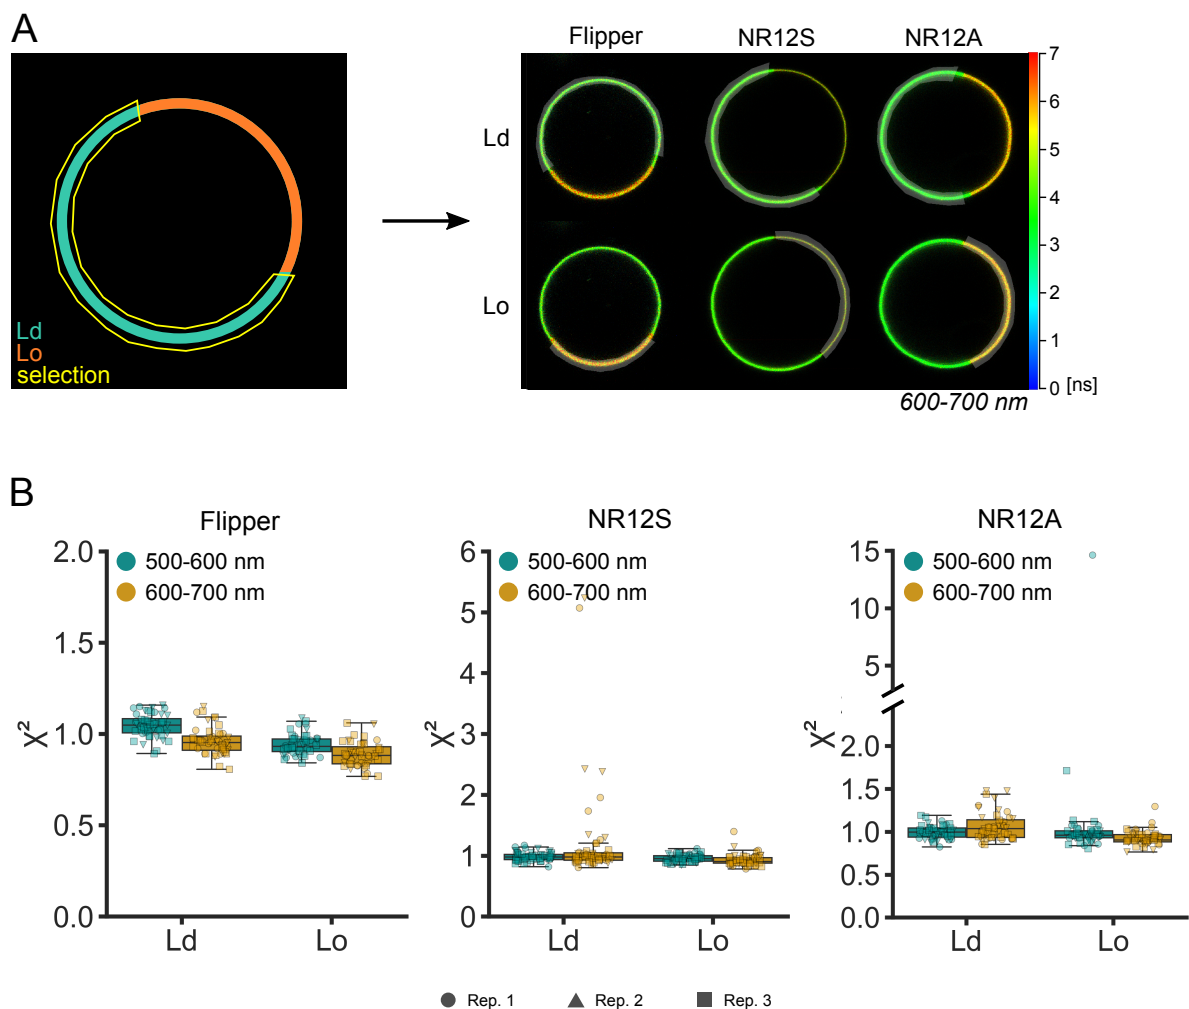

**Figure S5: Phase selection and Chi-squared values of the multiexponential curve fitting of Flipper, NR12S and NR12A in phase-separated GUVs.** Lifetime measurements in phase-separated GUVs were carried out at 500-600 nm or 600-700 nm emission. Multiexponential curve fitting was performed for the fluorescence decays (for details see Material and Methods). A| Overview of manual phase selection procedure in the LAS X software. Liquid disordered (Ld) and liquid-ordered (Lo) phase were selected separately for each phase-separated GUV and each selection was used for lifetime analysis at 500-600 nm and 600-700 nm. B|  $\chi^2$  values serve as indicator for the goodness of the fit and were obtained for Ld and Lo phase and are shown for Flipper (left), NR12S (middle) and NR12A (right) at 500-600 nm and 600-700 nm. Different symbols correspond to GUVs of individual biological replicates (n=3).

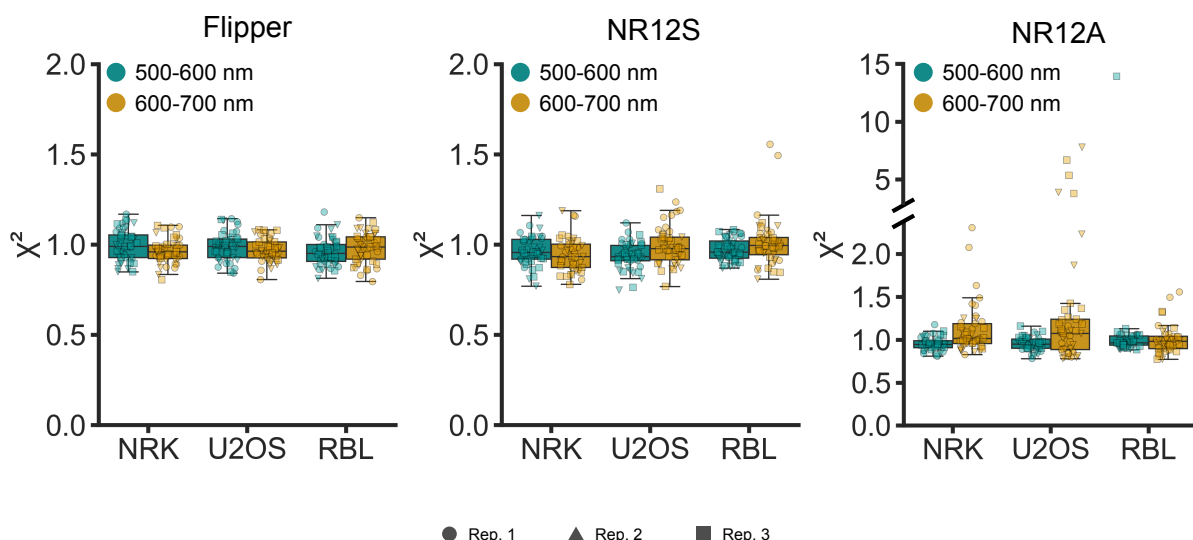

**Figure S6: Chi-squared values of the multiexponential curve fitting of Flipper, NR12S and NR12A in different cell types.** Lifetime measurements in NRK 52E, U2OS and RBL cells were carried out at 500-600 nm or 600-700 nm emission. Multiexponential curve fitting was performed for the whole-image fluorescence decays (for details see Material and Methods).  $\chi^2$  values serve as indicator for the goodness of the fit and were obtained for different cell types and are shown for Flipper (left), NR12S (middle) and NR12A (right) at 500-600 nm and 600-700 nm. Different symbols correspond to images of individual biological replicates (n=3).

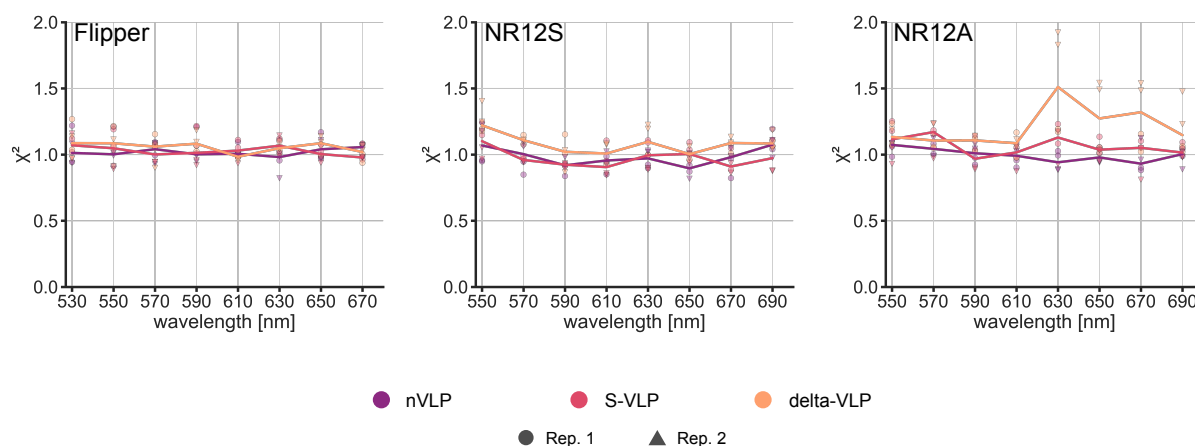

**Figure S7: Chi-squared values of the multiexponential curve fitting of Flipper, NR12S and NR12A in different VLP species.** Spectral fluorescence lifetime measurements of the probes in SARS-CoV-2 n-VLPs, S-VLPs or delta-VLPs were carried out within 500-700 nm in intervals of 20 nm. Multiexponential curve fitting was performed for the fluorescence decays (for details see Material and Methods).  $\chi^2$  values serve as indicator for the goodness of the fit and were obtained for each 20 nm interval and are shown for Flipper (left), NR12S (middle) and NR12A (right) in different VLP species. Line corresponds to the median of individual biological replicates shown with different symbols (n=2).
